# Supplementary material
Source: Springer Nature journal article supplement (https://www.springermedizin.de/resource/supplementary/13054_2011_9608_MOESM1_ESM.pdf/9706610)
Supplement: MOESM1 [file 9706610]

**SITUATION-FOCUSED**

AD HOC 2  
Admission  
(see in detail  
Figure 2)

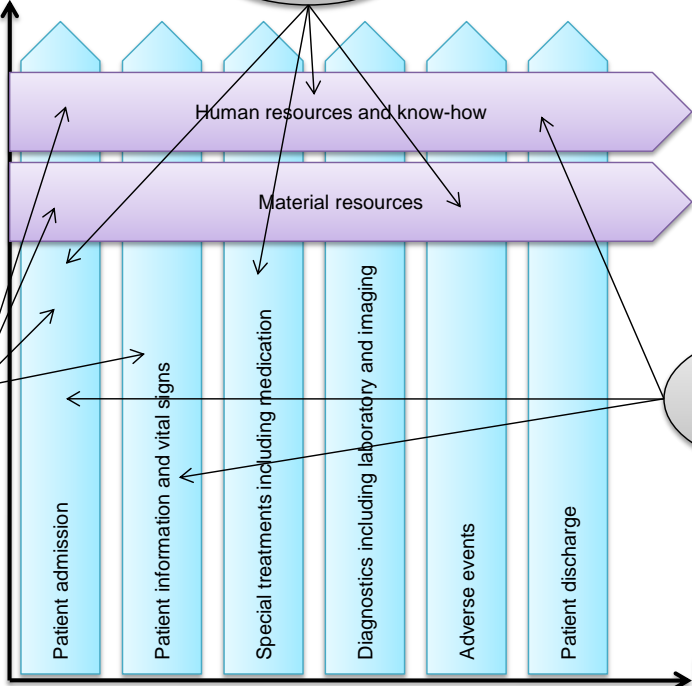

AD HOC 1  
Admission  
(see in detail  
Figure 2)

AD HOC 3  
Admission  
(see in detail  
Figure 2)

**PROCESS-FOCUSED**
